# Supplementary material for: Novel roles for GATAe in growth, maintenance and proliferation of cell populations in the Drosophila renal tubule
Source: Oxford University Press journal article supplement (doi:10.1242/dev.178087), 2019-04-29
Supplement: dev178087supp.pdf [file dev178087supp.pdf]

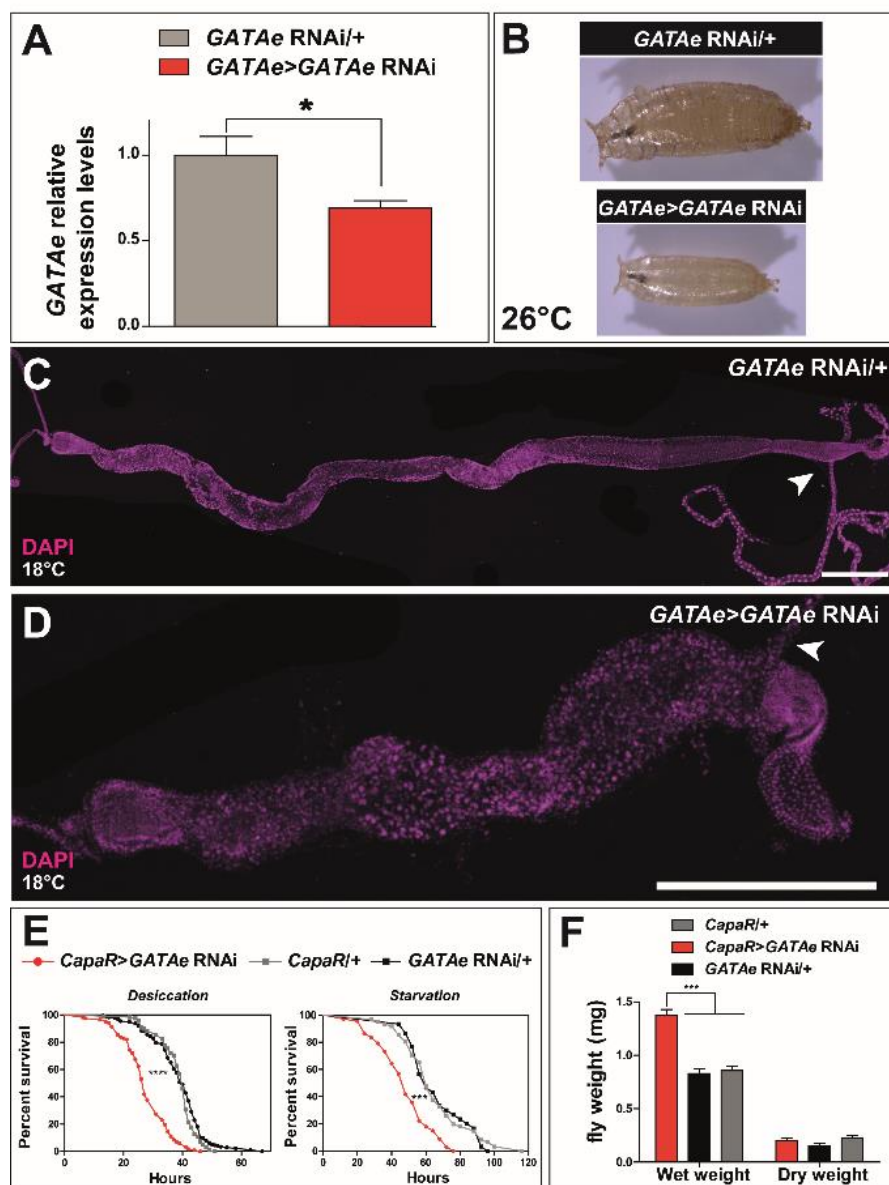

**Figure S1. *GATAe>GATAe* RNAi characterisation and *CapaR>GATAe* RNAi stress assays.**

**(A)** *GATAe* expression of *GATAe>GATAe* RNAi embryos compared to the control (15h after egg laying). The bar with \* indicates  $P < 0.05$ , Student's *t*-test, two tailed. **(B)** Size comparisons of *GATAe>GATAe* RNAi pupae (below) control (top) raised at 26°C. Both images are at same scale. **(C and D)** Adult MGs stained with DAPI (magenta) of *GATAe>GATAe* RNAi (C) and control (D, *GATAe RNAi/+*). Arrowheads indicate ureter regions. Scale bars are 500µm. **(E)** Desiccation (left) and starvation (right) assays of *CapaR>GATAe* RNAi adult female flies. Median survivals (hours) are: desiccation, *CapaR>GATAe* RNAi = 27, *CapaR/+* = 40, *GATAe RNAi/+* = 40,  $n > 100$  flies, and starvation, *CapaR>GATAe* RNAi = 48, *CapaR/+* = 60, *GATAe RNAi/+* = 60. In both assays, \*\*\* indicates  $P < 0.0001$ , Log-rank test. **(F)** Wet and dry weights of *GATAe* knockdown compared to both parental controls. \*\*\* indicates  $P < 0.0001$ ,  $n > 90$ .

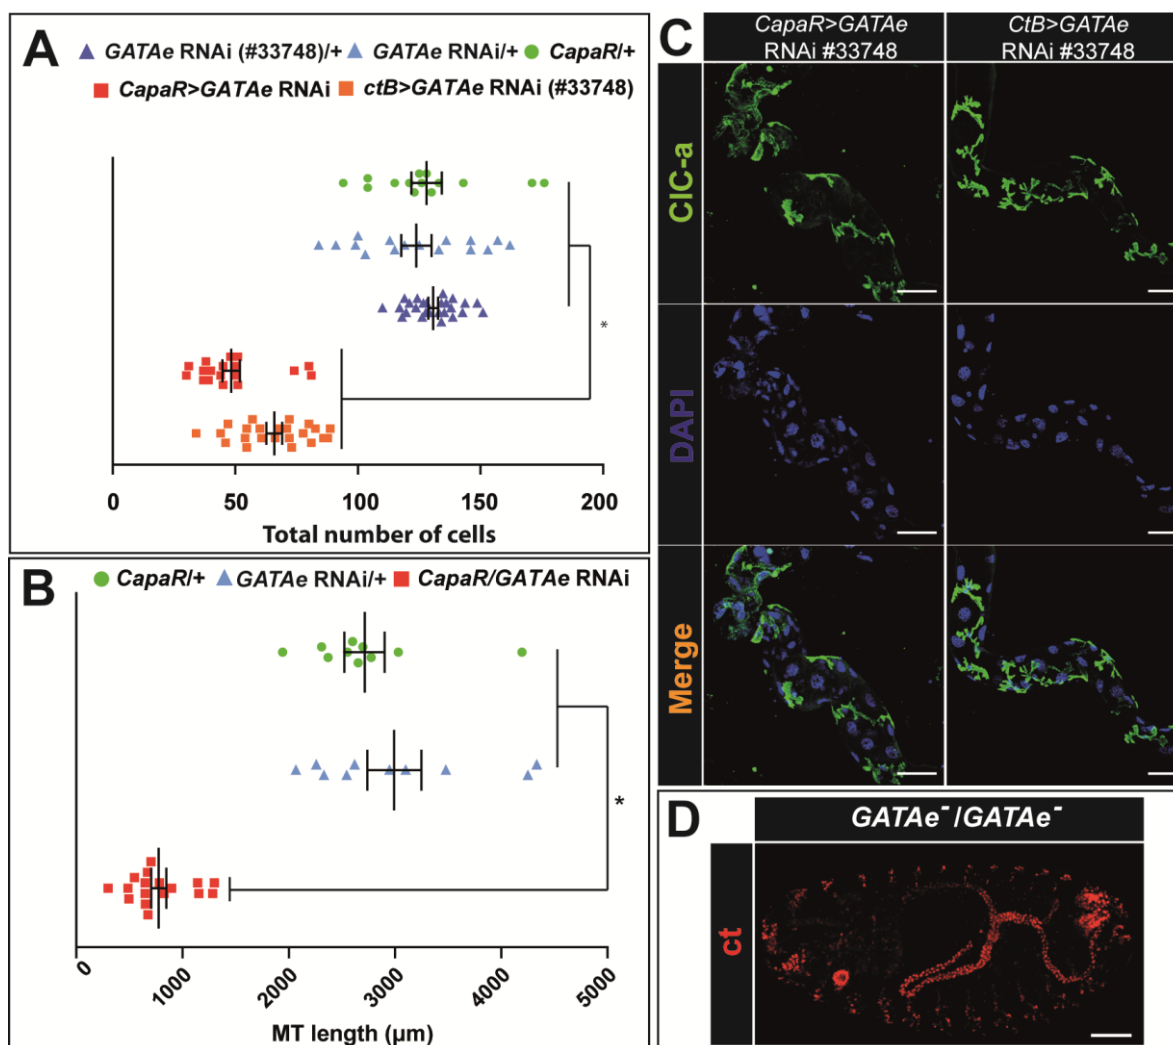

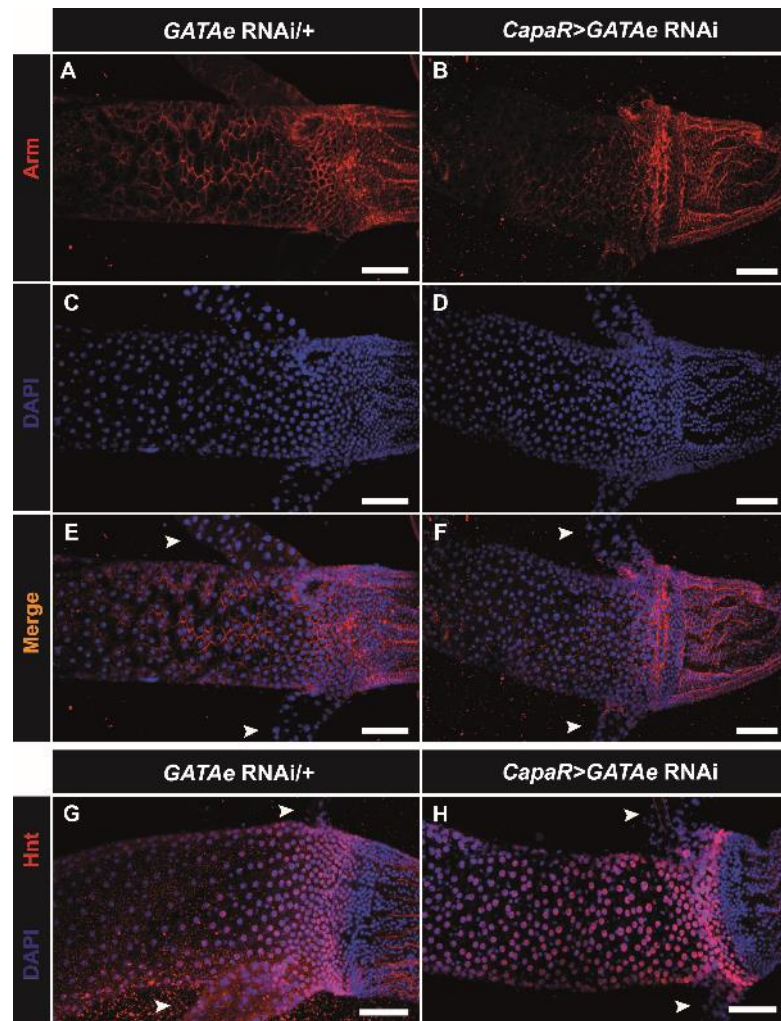

**Figure S3. Silencing *GATAe* in PCs does not affect MG morphology.**

Maximum projections of adult *CapaR>GATAe* RNAi posterior MGs, including a portion of the hindgut, stained with Arm (red) and DAPI (blue) (**A-F**) or with Hint and DAPI (**G and H**). White arrowheads indicate the ureters. Scale bars are 50 $\mu$ m.

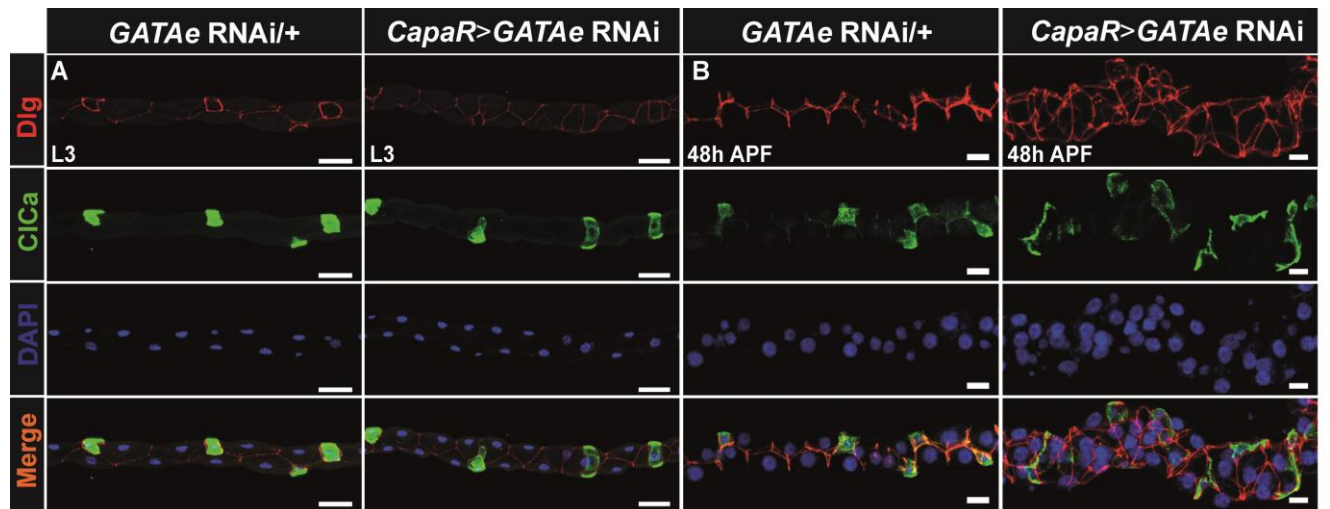

**Figure S4. *CapaR>GATAe* RNAi tubules present structural defects from pupal stage.**

**(A)** Comparison of L3 control and *CapaR>GATAe* RNAi knockdown MTs. Merge images show overlay of Dlg (red), CIC-a (green) and DAPI (blue). **(B)** Comparison of 48h APF control and *CapaR>GATAe* RNAi MTs. Scale bars are 50µm.



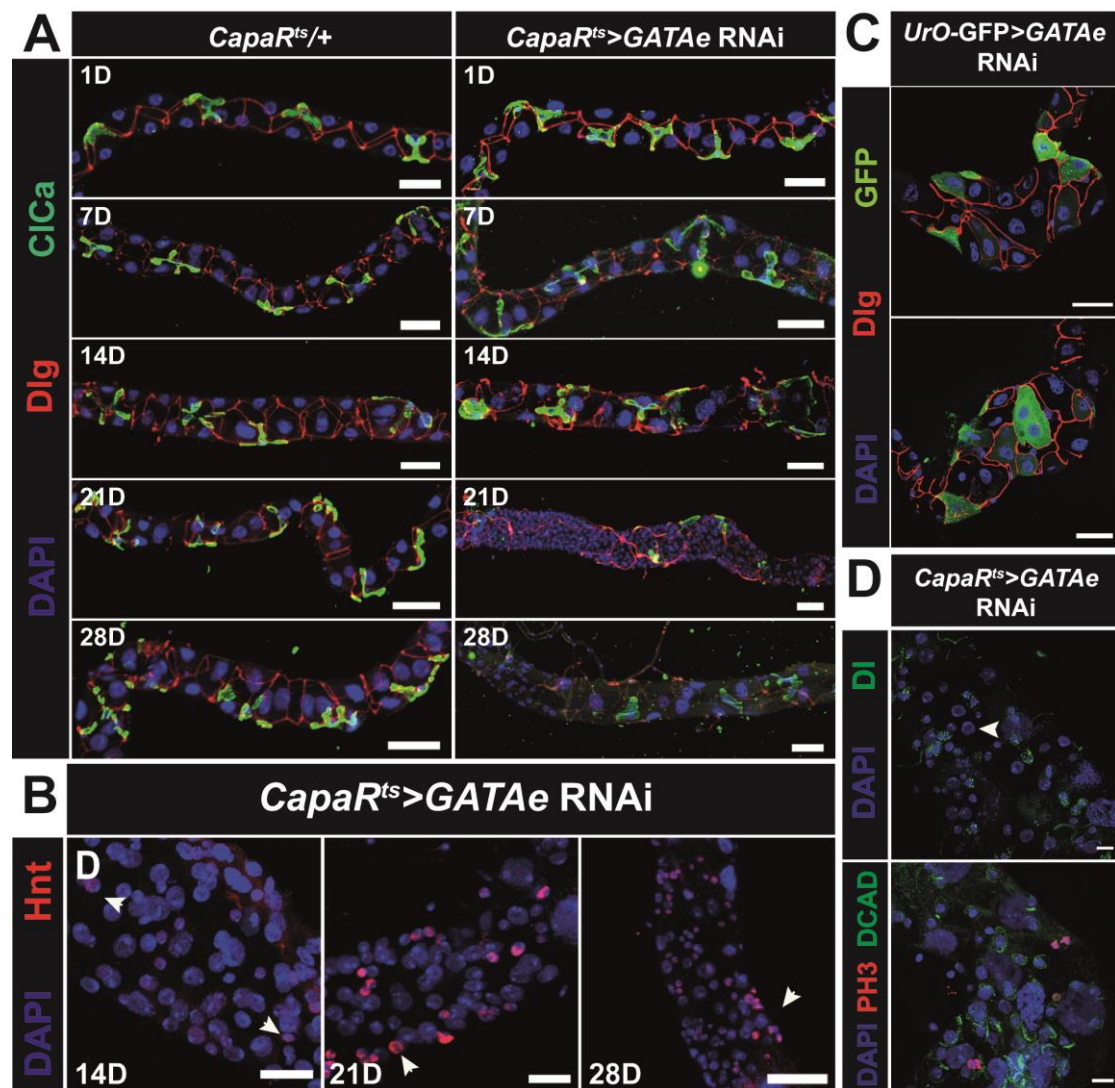

**Figure S5. Tissue and time-specific downregulation of GATAe.**

**(A)** Main segments of adult *CapaR<sup>ts</sup>>GATAe RNAi* flies that were raised at 18°C until eclosion and then switched to 29°C from day 1 to day 28 and immunostained every 7 days with Dlg (red), CIC-a (green), and DAPI (blue). Scale bars are 50µm. **(B)** Regions of MTs from *CapaR<sup>ts</sup>>GATAe RNAi* flies that were raised at 18°C until eclosion and then switched to 29°C and stained at 14 days, 21 days and 28 days with Hindsight (red) and DAPI (blue). Scale bars are 20µm in 14D and 21D and 50µm in 28D. **(C)** Main segments of *UrO-GFP>GATAe RNAi* MTs stained with Dlg (red) and GFP (green) and DAPI (blue). Cells with two nuclei are indicated with white arrows. Scale bars are 50µm. **(D, top)** DI (green) staining for adult main segment, together with DAPI (blue). DI<sup>+</sup> cells correspond to RBs (white arrowhead). **(D, bottom)** Presence of proliferating cells in the main segment of *GATAe* knockdown tubule, stained with PH3, indicated with white arrowhead. Scale bars are 10µm.

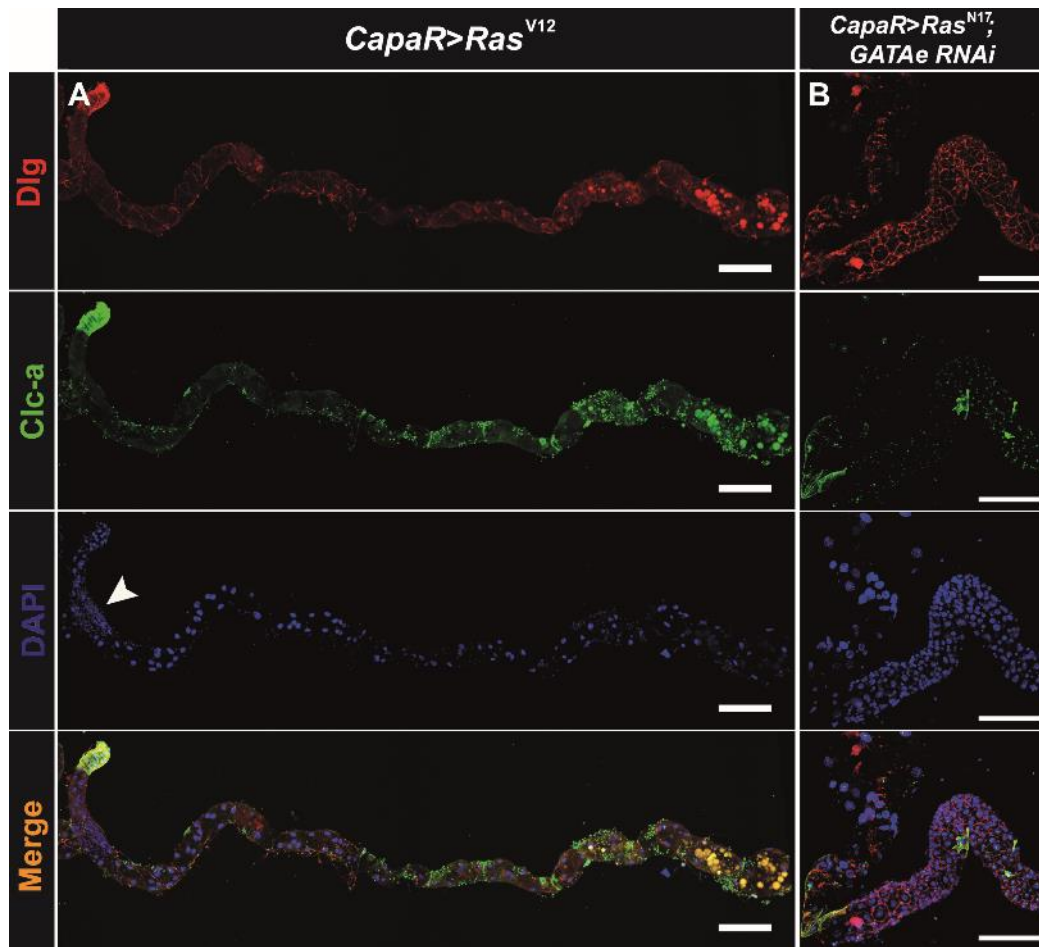

**Figure S6. Overactivation of *Ras* signalling induces similar phenotypes to *GATAe* knockdown MTs.**

**(A)** Immunocytochemistry of adult *CapaR>Ras<sup>V12</sup>* MTs stained with Dlg (red), CIC-a (green) and DAPI (blue). Accumulation of potential RNSCs is indicated with white arrowhead. **(B)** Expression of a dominant negative form of *Ras85d* (*Ras<sup>N17</sup>*) does not rescue the morphological defects caused by *GATAe* knockdown. Scale bars are 200µm in A and 100µm in B.

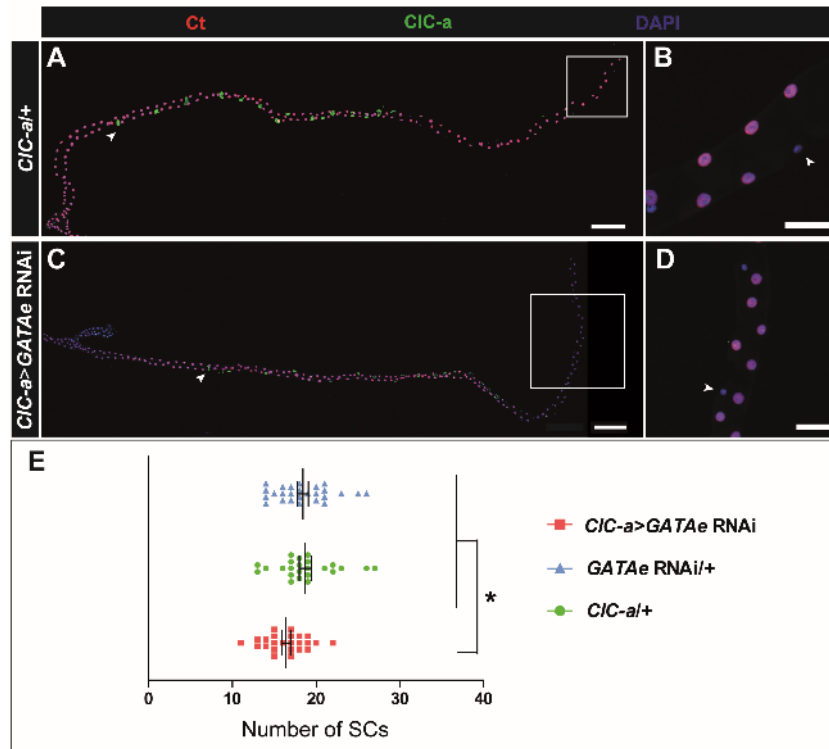

**Figure S7. *GATAe* knockdown in SCs show normal localisation of SCs.**

**(A, D)** Immunocytochemistry of L3 stage *CIC-a/+* (A and B) and *CIC-a>GATAe RNAi* (C and D) MTs. White arrowheads in A and C indicate the most proximal SC. B and D are magnifications of white squares in A and C, respectively, showing SCs negative for *CIC-a* and *ct* (white arrowheads), which are bar cells (small cells located in the initial segment). Scale bars are 200 $\mu$ m (A and C) and 50 $\mu$ m (B and D). **(E)** SCs quantifications of adult tubules from different genotypes. Means  $\pm$  SEM are: *CIC-a/+* = 18.71  $\pm$  3.48, n=24, *GATAe RNAi/+* = 18.42  $\pm$  3.28, n= 24, *CIC-a>GATAe RNAi* = 16.42  $\pm$  2.5, n=26. \* indicates  $P < 0.05$ , student's *t*-test, two-tailed.
